# Supplementary material for: Effects of Diabetic Case Management on Knowledge, Self-Management Abilities, Health Behaviors, and Health Service Utilization for Diabetes in Korea
Source: PubMed Central journal article supplement — Yonsei Med J. 2014 Dec 10;56(1):244–52. doi: 10.3349/ymj.2015.56.1.244 (PMC4276763; doi:10.3349/ymj.2015.56.1.244), 2014-12-10
Supplement: ymj-56-244-s001.pdf [file ymj-56-244-s001.pdf]

**Supplementary Table 1. Patients' Responses to Knowledge about Diabetes**

|    |                                                                                                                                                                                | At baseline (%) |       |            | After intervention (%) |       |            |
|----|--------------------------------------------------------------------------------------------------------------------------------------------------------------------------------|-----------------|-------|------------|------------------------|-------|------------|
|    |                                                                                                                                                                                | True            | False | Don't know | True                   | False | Don't know |
| 1  | If diabetes is not controlled, you are likely to suffer from colds, tuberculosis & other diseases                                                                              | 54.4            | 39.2  | 6.4        | 89.0                   | 8.1   | 2.1        |
| 2  | If a diabetic patient suffers from colds or stress, his/her blood sugar levels are increased                                                                                   | 67.0            | 28.2  | 4.8        | 93.0                   | 5.3   | 1.7        |
| 3  | Psychological strain is one of the causes of diabetes                                                                                                                          | 70.3            | 25.5  | 4.2        | 92.3                   | 5.6   | 2.0        |
| 4  | Egg yolk is a good food source for diabetic patients                                                                                                                           | 50.5            | 40.5  | 9.1        | 16.6                   | 74.3  | 9.0        |
| 5  | You can suffer numbness or sensory loss in hands & feet, or experience neuropathy symptoms such as diabetes complications                                                      | 68.2            | 27.3  | 4.5        | 91.3                   | 6.7   | 2.0        |
| 6  | Elevated blood glucose levels over a long period of time can lead to visual disorders                                                                                          | 79.1            | 18.1  | 2.8        | 94.5                   | 4.5   | 1.0        |
| 7  | It is better for diabetic patients to frequently take snacks rather than have three meals a day                                                                                | 41.6            | 53.1  | 5.3        | 15.6                   | 80.3  | 4.1        |
| 8  | My ideal weight is ( ) kg                                                                                                                                                      | 30.1            | 60.1  | 9.8        | 58.9                   | 27.2  | 14.0       |
| 9  | If you have cold sweats, palpitations, hunger, tiredness, trembling of hands, or headache after taking medication including insulin, you should take sugar as soon as possible | 65.6            | 29.6  | 4.7        | 90.8                   | 7.0   | 2.2        |
| 10 | Normal fasting blood sugar level is ( ) mg/dL                                                                                                                                  | 37.9            | 53.1  | 9.0        | 70.7                   | 21.0  | 8.3        |

The correct answer for No. 4 and No. 7 is false and the correct answer for the others is true. Each correct answer corresponds to a score of 1, and "wrong answer" and "Don't know" correspond to 0.
