# Supplementary material for: Effects of Diabetic Case Management on Knowledge, Self-Management Abilities, Health Behaviors, and Health Service Utilization for Diabetes in Korea
Source: PubMed Central journal article supplement — Yonsei Med J. 2014 Dec 10;56(1):244–52. doi: 10.3349/ymj.2015.56.1.244 (PMC4276763; doi:10.3349/ymj.2015.56.1.244), 2014-12-10
Supplement: ymj-56-244-s002.pdf [file ymj-56-244-s002.pdf]

**Supplementary Table 2. Patients' Responses to Nutrition Management Test Items (Unit: %)**

|                        |                                                                                               | At baseline |            |      |       |        | After intervention |            |      |       |        |
|------------------------|-----------------------------------------------------------------------------------------------|-------------|------------|------|-------|--------|--------------------|------------|------|-------|--------|
|                        |                                                                                               | Never       | Some times | Half | Often | Always | Never              | Some times | Half | Often | Always |
| Nutrition<br>(n=5808)  | Do you take your meals at arranged times?                                                     | 3.4         | 14.1       | 25.0 | 37.2  | 20.3   | 0.6                | 3.9        | 18.2 | 49.7  | 27.6   |
|                        | Do you take your meals without skipping them?                                                 | 1.8         | 9.6        | 21.2 | 41.3  | 26.1   | 0.3                | 2.9        | 14.1 | 48.8  | 33.9   |
|                        | Do you take any snacks between meals?                                                         | 8.5         | 34.7       | 29.8 | 21.5  | 5.4    | 9.2                | 45.6       | 27.0 | 14.2  | 4.0    |
|                        | Do you take meals fixed amounts?                                                              | 3.3         | 13.1       | 29.4 | 38.5  | 15.7   | 0.8                | 4.1        | 20.2 | 52.8  | 22.1   |
| Monitoring<br>(n=5398) | Do you monitor according to the instructed frequency?                                         | 32.8        | 27.9       | 17.0 | 15.4  | 6.9    | 32.7               | 27.9       | 17.1 | 15.4  | 7.0    |
|                        | Do you record values?                                                                         | 55.0        | 19.3       | 10.0 | 8.9   | 6.8    | 25.0               | 17.3       | 21.3 | 22.1  | 14.2   |
|                        | Do you adjust meals or medicine according to glucose levels?                                  | 33.8        | 19.6       | 21.3 | 17.7  | 7.6    | 17.0               | 13.6       | 24.4 | 31.4  | 13.7   |
| Foot care<br>(n=5789)  | Do you examine the condition of your feet every day?                                          | 11.3        | 16.0       | 22.0 | 22.6  | 18.2   | 1.7                | 5.4        | 16.3 | 48.1  | 28.5   |
|                        | Do you wash and dry your feet thoroughly every day?                                           | 7.2         | 12.8       | 23.3 | 36.8  | 20.0   | 1.2                | 4.0        | 45.2 | 48.8  | 30.8   |
|                        | Do you cut your toenails in a straight line?                                                  | 29.2        | 19.6       | 21.5 | 19.6  | 10.1   | 8.4                | 9.8        | 23.5 | 37.6  | 20.6   |
| Oral care<br>(n=5779)  | Do you take oral examinations more than twice a year?                                         | 30.1        | 25.5       | 20.5 | 17.1  | 6.8    | 23.4               | 20.7       | 23.9 | 23.4  | 8.6    |
|                        | Do you brush your teeth with a soft-bristle toothbrush after meals and before going to sleep? | 9.8         | 14.7       | 27.0 | 33.4  | 15.2   | 3.8                | 7.3        | 21.6 | 42.9  | 24.4   |
| Medication<br>(n=5662) | Do you take (inject) medicine according to the prescribed schedule?                           | 10.9        | 2.5        | 5.2  | 29.1  | 52.2   | 8.0                | 1.1        | 2.8  | 24.1  | 63.9   |
|                        | Do you take (inject) medicine at the prescribed time?                                         | 11.1        | 3.1        | 7.4  | 29.3  | 49.0   | 8.0                | 1.2        | 3.7  | 26.0  | 61.0   |
|                        | Do you take (inject) medicine in prescribed dosages?                                          | 11.1        | 2.8        | 5.7  | 28.7  | 51.7   | 8.0                | 1.2        | 3.0  | 24.5  | 63.2   |
